# Supplementary material
Source: PubMed Central journal article supplement (PMC6380902)

Appendix 2 (as supplied by the authors)

**PARENT'S JOB:**

✓ **TO DECIDE WHERE,**

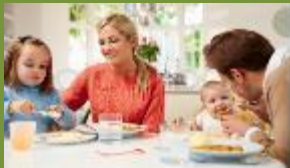

**AT THE FAMILY TABLE**

✓ **WHEN**

**REGULAR FAMILY MEALS  
AND SNACK TIMES**

✓ **WHAT TO FEED**

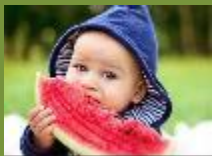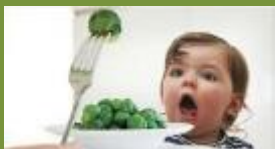

**A WIDE VARIETY OF HEALTHY  
FOODS**

**BABY'S JOB:**

✓ **TO DECIDE WHETHER  
TO EAT,**

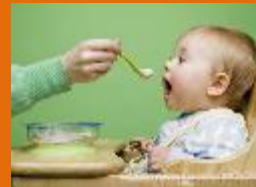

✓ **OR NOT!**

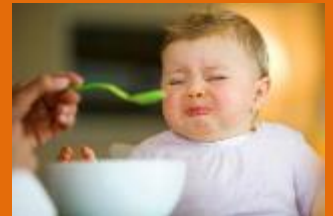

✓ **AND HOW MUCH**

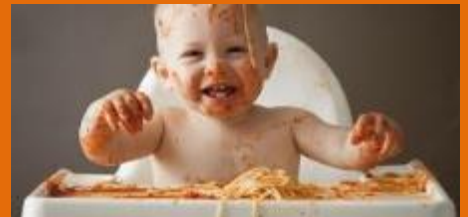

Supplement: supp_7.1.E81_2018-0066-2-at.pdf [file supp_7.1.E81_2018-0066-2-at.pdf]
