# Supplementary material
Source: PubMed Central journal article supplement (PMC6380902)
Supplement: supp_7.1.E81_2018-0066-5-at.pdf [file supp_7.1.E81_2018-0066-5-at.pdf]

# Appendix 5 (as supplied by the authors): Theoretical Thematic Analysis

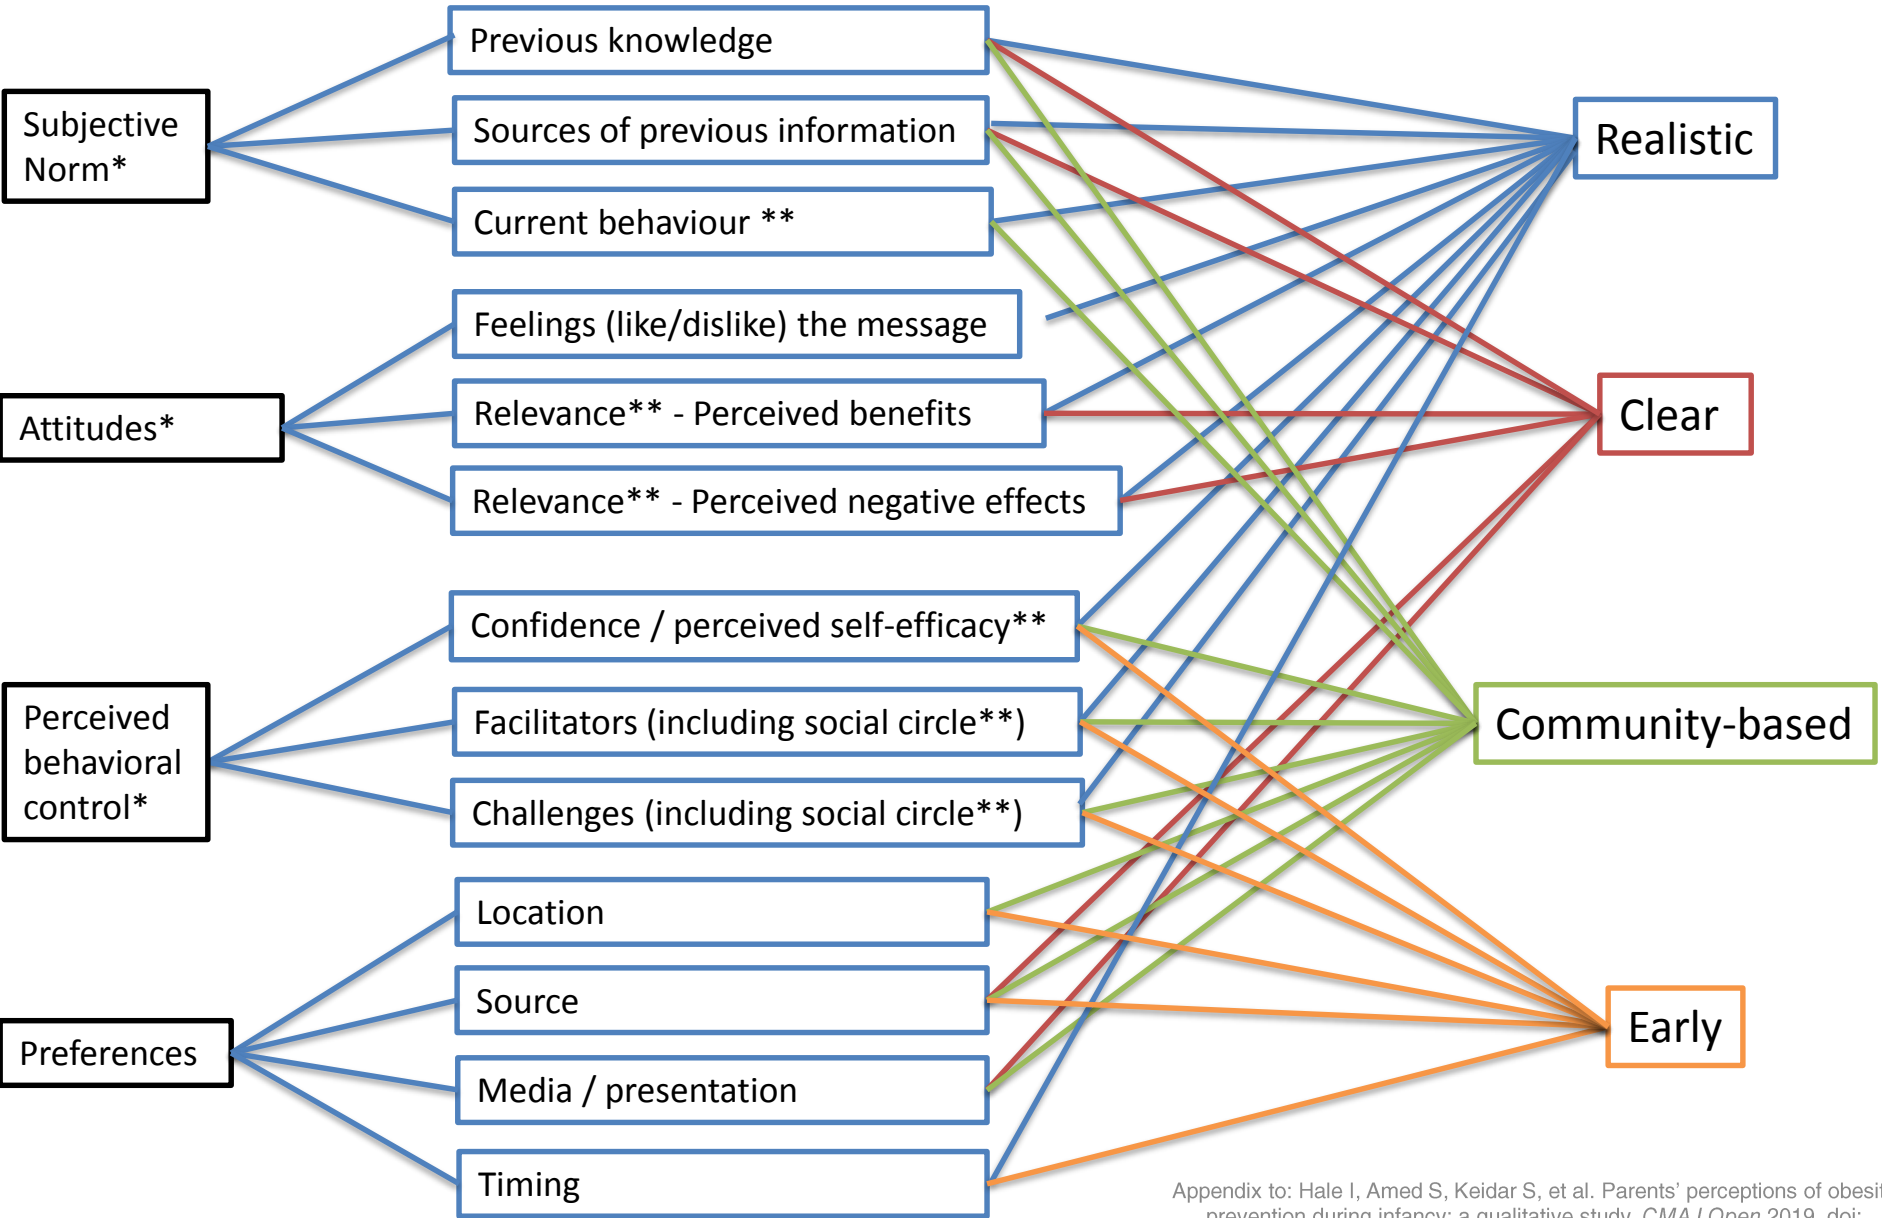

\*Theory of Planned Behaviour  
 \*\*Social Cognitive Theory
